# Supplementary material
Source: Springer Nature journal article supplement (https://www.springermedizin.de/resource/supplementary/12968_2011_2032_MOESM2_ESM.pdf/9581188)

FR 67Hz  
13cm

2D  
72%  
C 50  
P Low  
HGen

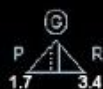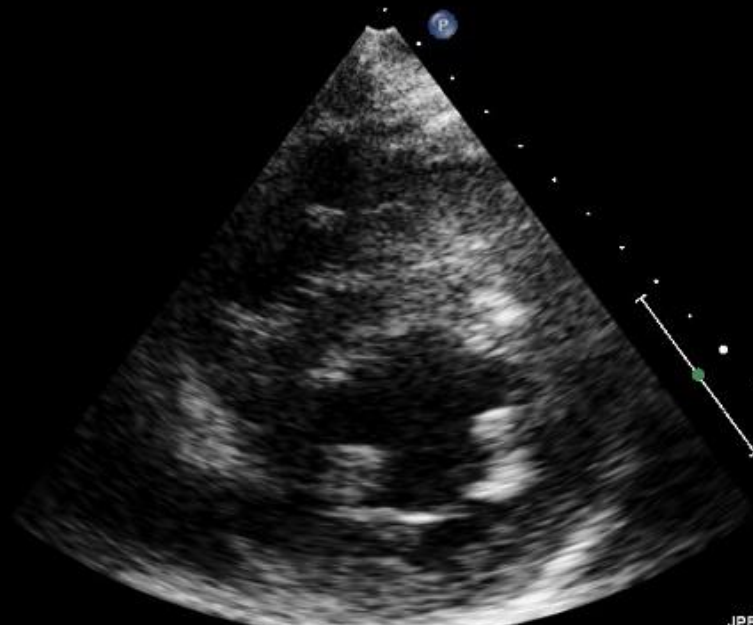

JPEG

66 bpm

A

PHILIPS

3

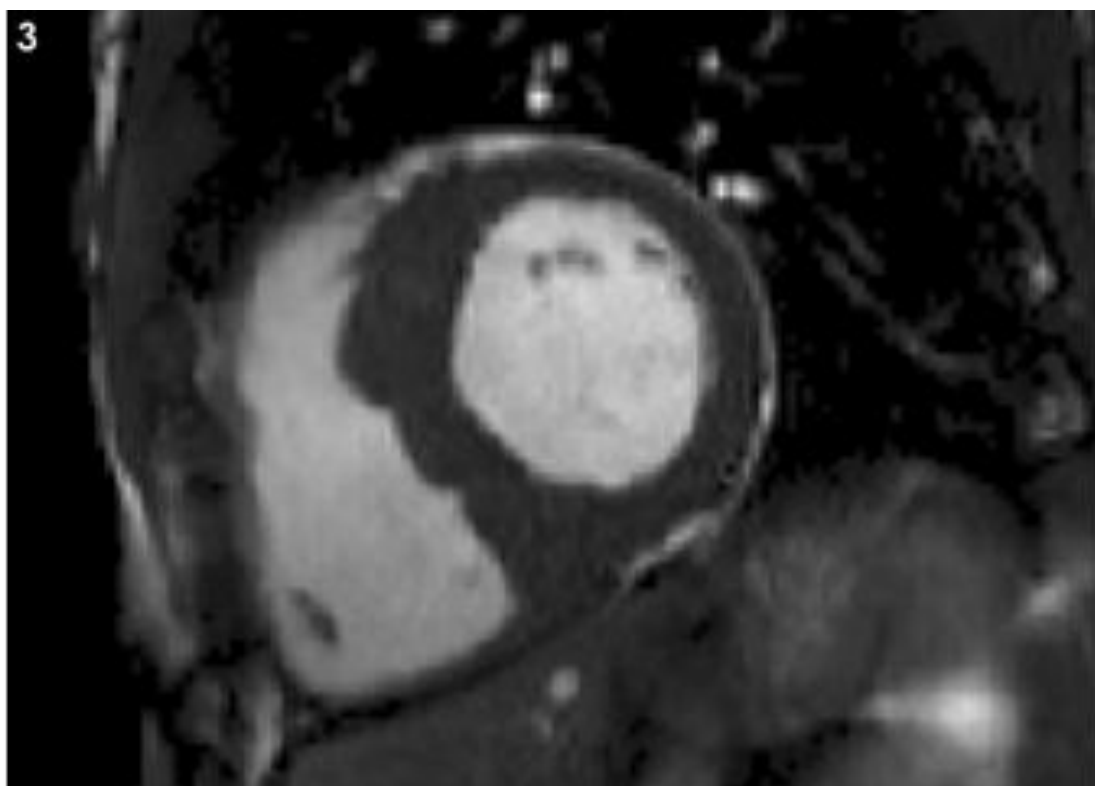

B

Supplement: MOESM2 [file 9581188]
